# Supplementary material for: Generation of aggregation prone N-terminally truncated amyloid β peptides by meprin β depends on the sequence specificity at the cleavage site
Source: Springer Nature journal article supplement (doi:10.1186/s13024-016-0084-5), 2016-02-19
Supplement: MOESM1 [file 9776572]

Fig. S1

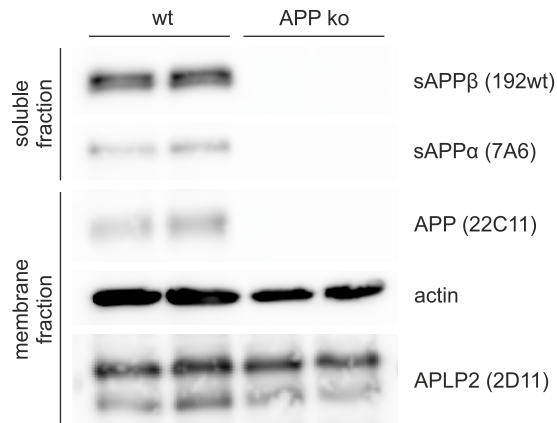

**Additional Fig. 1: Antibodies 192wt and 7a6 only detect sAPP in brain soluble fractions of wildtype mice.**

To test the specificity of the antibodies 7A6 and 192wt we compared brain soluble fractions of wildtype and APP ko mice. Here, we could show that by using the corresponding antibodies both sAPP $\alpha$  and sAPP $\beta$  are detectable in brain soluble fractions of wildtype, but are lacking in those of APP ko. Since APLP2 can also be detected in APP ko brain membrane fractions, we show that the knock-out is restricted to APP and does not involve other members of the APP family.
