# Supplementary material for: Generation of aggregation prone N-terminally truncated amyloid β peptides by meprin β depends on the sequence specificity at the cleavage site
Source: Springer Nature journal article supplement (doi:10.1186/s13024-016-0084-5), 2016-02-19
Supplement: MOESM2 [file 9776572]

Fig. S2

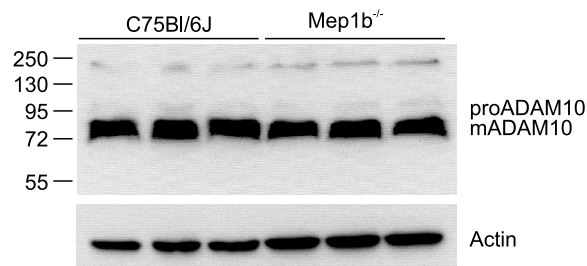

**Additional Fig. 2: ADAM10 protein levels are not altered in Mep1b<sup>-/-</sup> animals.**

To exclude that the lack of meprin  $\beta$  has any effect on ADAM10 levels, which could affect sAPP levels, we analyzed lysates of whole brains from 16 week old Mep1b<sup>-/-</sup> and wt animals via SDS-PAGE. By using a C-terminal polyclonal ADAM10 antibody (pineda) we detected neither a difference on levels of mature ADAM10 nor on levels of the pro form proADAM10. Therefore, we suggest that, when meprin  $\beta$  is lacking, the increase of sAPP $\alpha$  levels is indeed a result of higher substrate availability for ADAM10 which is independent on a lacking ADAM10/meprin  $\beta$  interaction.
