# Supplementary material for: Generation of aggregation prone N-terminally truncated amyloid β peptides by meprin β depends on the sequence specificity at the cleavage site
Source: Springer Nature journal article supplement (doi:10.1186/s13024-016-0084-5), 2016-02-19
Supplement: MOESM3 [file 9776572]

Fig. S3

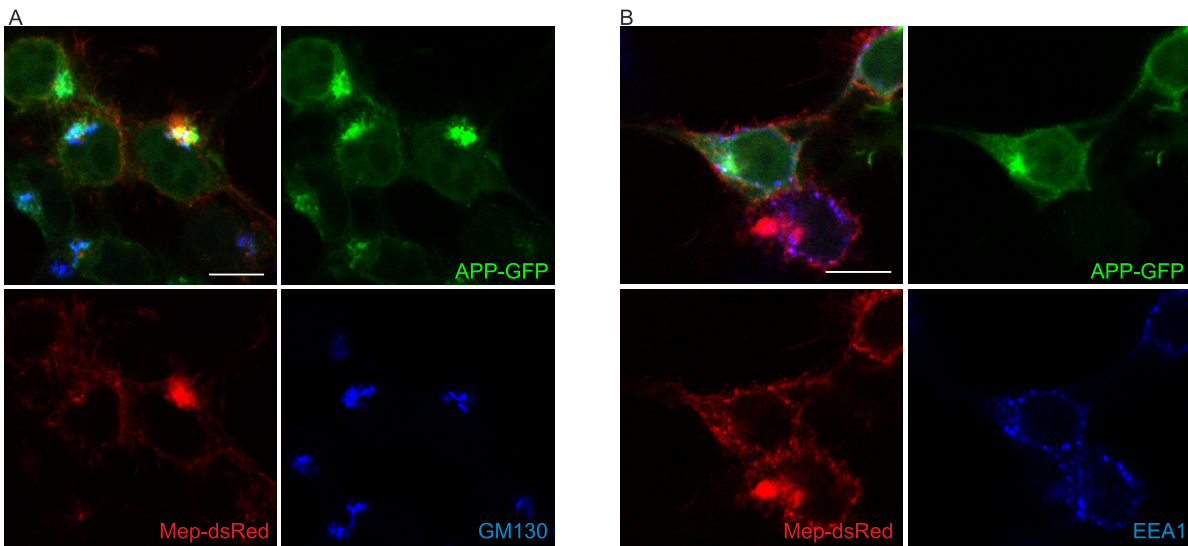

**Additional Fig. S3: APP and meprin  $\beta$  colocalize in the secretory pathway and at the cell surface.**

HEK293T cells were co-transfected with APP-GFP and meprin  $\beta$ -dsRed. Both proteins predominantly colocalize in the cis-golgi compartment. Colocalization in early endosomes was hardly detectable.
