# Supplementary material for: Generation of aggregation prone N-terminally truncated amyloid β peptides by meprin β depends on the sequence specificity at the cleavage site
Source: Springer Nature journal article supplement (doi:10.1186/s13024-016-0084-5), 2016-02-19
Supplement: MOESM4 [file 9776572]

Fig. S4

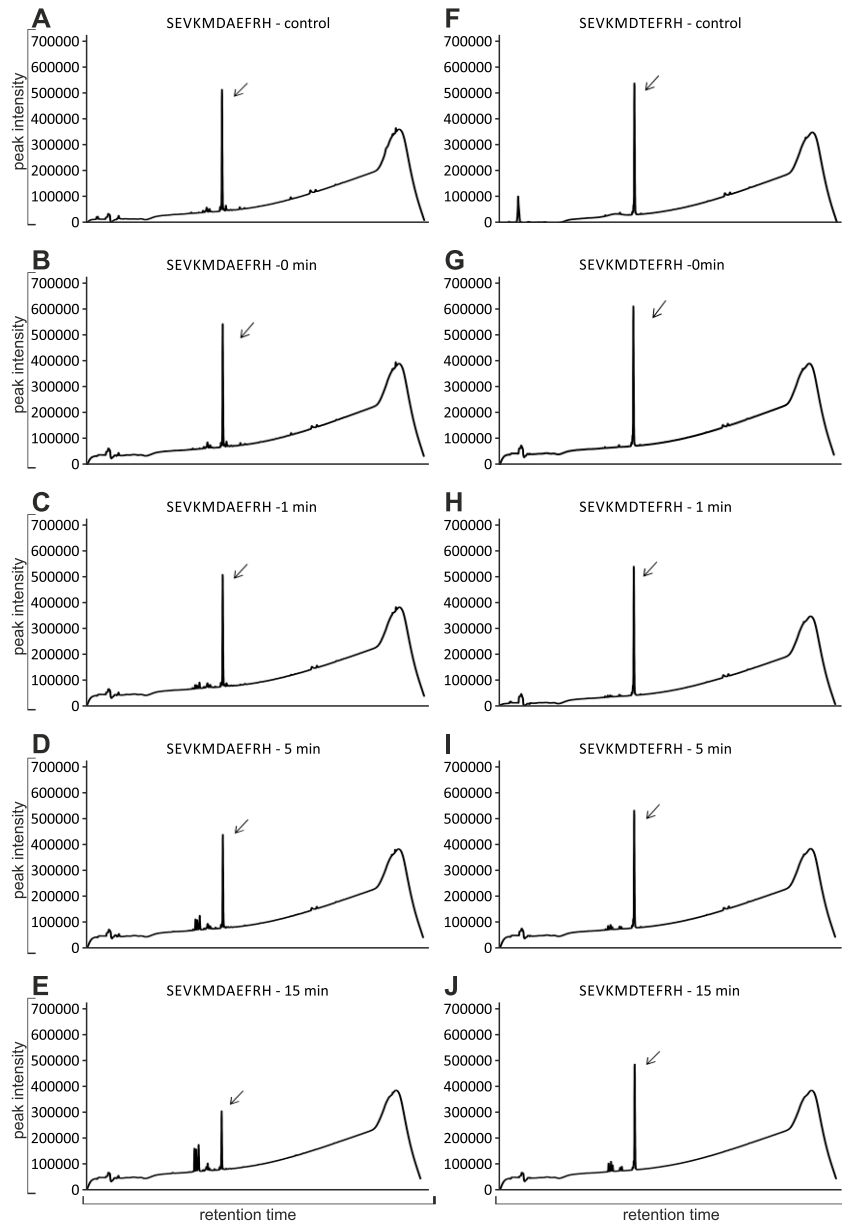

**Additional Fig. S4: Meprin  $\beta$  prefers cleavage of wt APP compared to APP A673T.** 15 nm recombinant meprin  $\beta$  was incubated with synthetic APP peptides for different time intervals. HPLC analysis showed that processing kinetics of APP A376T (F-J) were decreased compared to wt APP (A-E). Occurring peaks with smaller retention times were identified as cleavage products by MALDI MS. Peak intensity has been measured at 214
